# Supplementary material
Source: HighWire-hosted journal article supplement (http://gut.bmjjournals.com/highwire/filestream/193032/field_highwire_adjunct_files/8/Tsilingiri_et._al._Sup._Fig._8.pdf)
Supplement: Tsilingiri_et._al._Sup._Fig._8.pdf [file Tsilingiri_et._al._Sup._Fig._8.pdf]

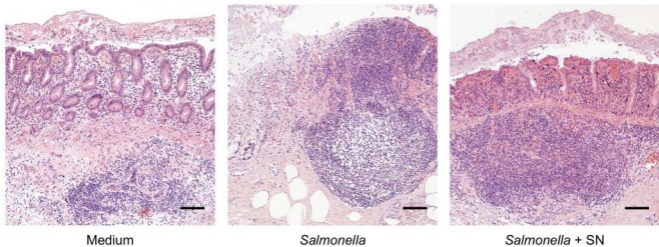

Supplementary Figure 8. *L.paracasei* SN inhibits *Salmonella* penetration as well as lymphoid aggregate translocation to the apical surface.

Tissues were incubated with medium (left panel), *Salmonella* typhimurium in the presence (right panel) or absence (middle panel) of 5% SN as described in Fig. 5.

Scale bars 200 $\mu$ m.
